# Supplementary material for: Identification of browning-related microRNAs and their targets reveals complex miRNA-mediated browning regulatory networks in Luffa cylindrica
Source: PubMed Central journal article supplement (PMC6214963; doi:10.1038/s41598-018-33896-9), 2018-11-02
Supplement: 41598_2018_33896_MOESM1_ESM.pdf [file 41598_2018_33896_MOESM1_ESM.pdf]

**Identification of browning-related microRNAs and their targets reveals complex miRNA-mediated browning regulatory networks in *Luffa cylindrica***

Yuanyuan Xu, Zhe Liu, Lina Lou, Xiaojun Su\*

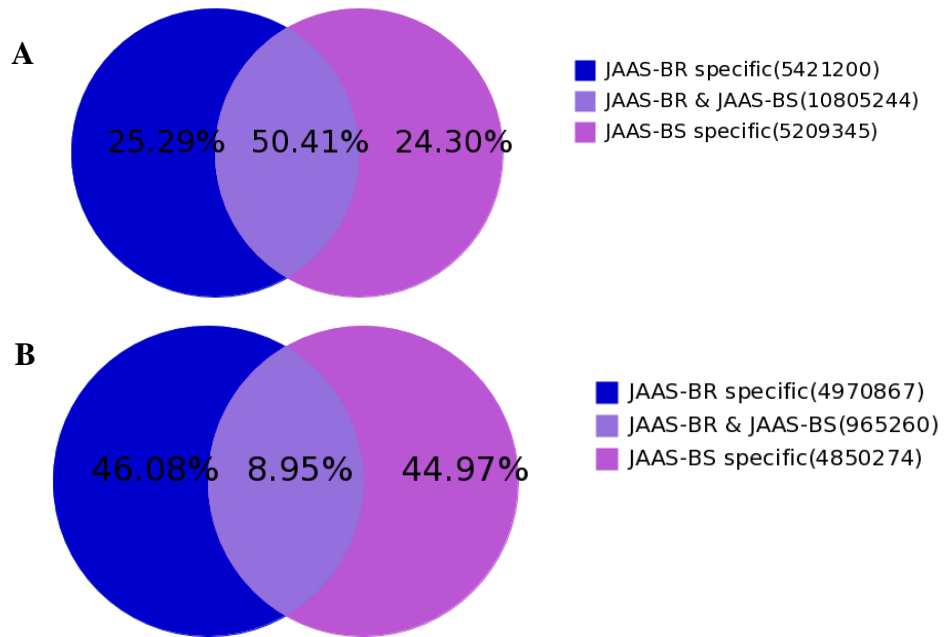

**Supplementary Figure S1: Venn chart for total sRNAs (A) and unique sRNAs (B) between JAAS-BR and JAAS-BS libraries.**



\*\*\*\*\*  
\*\*\*\*\*AT

TGGAGTGAAGGGAGCT\*\*\*\*\*

**miR156a**

AAAGAGGGTTTGTTGAGAACTGACAGAAGAGAGTGAGTACACGCAGGCAATTGTAT  
AGTGGACTATACTCTTGTGTTGAGTTATGCGTGTGCTCACTTCTCTCCGTCAGCCCTTGC  
TCTTTTTTTCTC

(((((((((.....((((((((((((((((((((((((((((((((((((((((.....)))))))))))))))))))))).....))))))))))..

....

\*\*\*\*\*TGACAGAAGAGAGTGAGTAC\*\*\*\*\*  
\*\*\*\*\*

**miR156i-3p**

GATATTGACAGAAGAGAGTGAGCACATGCTGCAGTGATTGTATGATAGCATAACAATTCT  
TGGTGCCTGCTCACTTCTCTTTCTGTCATCTTAT

.....((((((((((((((((((((((((((((((((((((((((.....)))))))))))))))))))))).....

\*\*\*\*\*TGCTCACTT  
CTCTTTCTGTCATC\*\*\*\*

**miR156e-5p**

TGGTGGTGATAGAAGAGAGTGAGCACACATGGTGTCTTTCTTGCATGATGTTTATATATAT  
ATATGCTTGAAACTATGTGTGCTTACTCTCTATCTGTCACCCCA

..((((((((((((((((((((((((((((((((((((((((.....)))))))))))))))))))))).....

\*\*\*\*\*TGATAGAAGAGAGTGAGCAC\*\*\*\*\*  
\*\*\*\*\*

**miR156d-3p**

TTGACAGAAGATAGAGAGCACTAATGATGATATGCTAATTCATTCAGCAAAAGCATCT  
CACTTCATTTGTGCTCTCTATGCTTCTGTCATCA

..((((((((((((((((((((((((((((((((((((((((.....)))))))))))))))))))))).....

\*\*\*\*\*GCTCTC  
TATGCTTCTGTCATCA

**miR156e**

GTATGGTAGGTGACAGAGGAGAGTGAGCACTCATGGTTCTTTTCTTGCATGAAGTTTCT  
ATGCTTGAAGCTCTGTGTGCTTACTCCCTATCTGTCACCCCTCAAGCAT

(((((.....((((((((((((((((((((((((((((((((((((((((.....)))))))))))))))))))))).....

\*\*\*\*\*TGACAGAGGAGAGTGAGCAC\*\*\*\*\*  
\*\*\*\*\*

**miR156a-3p**

TTCGTTCCGTGGCTAACTGACAGAAGAGAGTGAGCACACAGCGGGCAGACTGCATCG  
ATCGATCTGCATCCGAGACGGCGCACGTACGAATGATGATGCAGCTGCTGCTGCGTGCT  
CACTTCTCTCTGTCAGTCCTCTAGCTGCTACGGC

((((((.....((((((((((((((((((((((((((((((((((((((((.....)))))))))))))))))))))).....

\*\*\*\*\*GCTCACTTCTCTCTGTCAGT\*\*\*\*\*  
\*\*\*\*\*

\*

**miR156e-3p**

CCGGCGGGCGCGCGCGGGTGACAGAAGAGAGTGAGCACACGGCCGGTGTGACGGC  
ACCGGCGCGGATGTGCCGTGCGGGCCGCGTGCTACTGCTCTCTGTATCCGCTGG  
CACACCCTCACG

..(((((((.....)))))))))

\*\*\*\*\*  
\*\*\*\*\*GCTCACTGCTCTCTGTATCCGCTGG\*\*\*\*\*

**miR156k-3p**

GGCTTAGGCCCGAAGAGATTGACAGAAGAGAGCGAGCACCTGGCGGCGGACCGGC  
ATGGAACGCATGCCGTCCCGCGCGTGCTCGCTTCTTTCTGTAGCCTCTCCCTCG  
TCCTGAG

..(((((((.....)))))))))

\*\*\*\*\*  
\*\*\*\*\*GCTCGCTTCTTTCTGTAGCCTCTCCCTCG\*\*\*\*\*

**miR157d-3p**

ATGTTGTATGTATAGTGAGGGTGATAGTGTGGTTGCTGACAGAAGATAGAGCACTA  
AGGATGATATGAAAACACACACATATATGTGCTTCTAATTGTATTTCATACTTAACATCA  
ATGTTGATGTGAATCGTGAAAAAAAAAAGAGAGAAGAGCTAGAGGAGCATCTGCA  
TCTCTATTCTATGTGCTCTCTATGCTTCTGTATCACCTTTTTTCTCTATTCTCTCTAC  
ACATTACATATTCACAT

..(((((((.....)))))))))

\*\*\*\*\*  
\*\*\*\*\*GCTCTCTATGCTTCTGTATCACCTTTTTTCTCTATTCTCTCTAC\*\*\*\*\*  
\*\*\*\*\*

**miR159b-5p**

GGAAGAGCTCCTTGAAGTTCAATGGAGGGTTAGCAGGGTGAAGTAAAGCTGCTAAG  
CTATGGATCCATAAGCCTTATCAAATTCAATATAATTGATGATAAGGTTTTTTTATGGA  
TGCCATATCTCAGGAGCTTCACTTACCCCTTTAATGGCTTCACTTCTTTGGATTGAA  
GGGAGCTCTTCACTCTC

..(((((((.....)))))))))

\*\*\*\*\*GAGCTCCTTGAAGTTCAATGG\*\*\*\*\*  
\*\*\*\*\*  
\*\*\*\*\*

**miR159b-3p**

AAACCCAACTTGGAGTTCCTGCCTCAAGTCTGAAAGGATATGATGGTAAACCTCT  
ACTGCTAGTTCATGGATACCTCTGACTTCTTAACAACATGCGTTCGAAGTCAAGGGTTT  
GCATGCCCTGGGAGATGAGTTACCTTGATCTTTGGTATTGGAGTGAAGGGAGCTCCA  
GAGGGTATTC

..(((((((.....)))))))))

\*\*\*\*\*



CCGGCTACACCTA

...(((((((.....))))))....

\*\*\*\*\*

ATTGGATTGAAGGGAGCTCCG\*\*\*\*\*

miR159f

GAAGAAGAAGACGAGCTCCCTTCGATCCAATCCAGGAGAGGAAGTGGTAGGATGCAG
CTGCCGGTTCATGGATACCTCTGCAGTGCATGTCGTAGGCTTGCACTTGCATGGGTTTG
CATGACCCGGGAGATGAACCCACCATTGTCTTCTCTTATGCTTGATTGAAGGGAGCT
CTACACCTCTCTC

.....(((((((.....))))))....

\*\*\*\*\*

CTTGGATTGAAGGGAGCTCTA\*\*\*\*\*

miR159

GGAGTCTTCCAGCCCAAACAGCTTCTTGATCTTCTTGAAAACCTTCTGTTTGGACTGA
AGGGAGCTCTAA

(((((((.....))))))....

\*\*\*\*\*TTTGGACTGAAGGGAGCTCTA\*

miR159e

CTGATGCTTGGATTGAAGCGGAGCTCCTATCATTCCAATGAAGGGCCGTTCTGAAGGG
TGGTTCCGCTGCTCGTTCATGGTTCCACTATCCTATCTCATCATGTATGTGTATGTAT
TTTCGAGAGGGAGGAGAGGAGCTAGACTCTCACGGTGGTCGTCTTTGAGATAGGCTTG
TGGTTTGCATGACCGAAGAGCTGCACCGTCCCTTGCTGGCCGCTCTTTGGATTGAAA
GGAGCTCTTGCATCTGATCCATCCATCC

..(((((((.....))))))....

\*\*\*\*\*

\*\*\*\*\*TTTGGATTG

AAAGGAGCTCTT\*\*\*\*\*

miR159e-3p

GCAGCTCCTGCAGCATCTGTTTCGAGGCTCGCCGCGTTCTGATGATCCGGCAGCGCAAG
TCCGGCGGCGACGGCGGCGCCGAGGTCGGCGGCGCCGCTGGCCGATTTGGTTTGA
AGGGAGCTCCAC

..(((((((.....))))))....

\*\*\*\*\*

\*\*\*\*\*ATTGGTTTGAAGGGAGCTCCA\*

miR159h-3p

GGTGCTCCCTTACACCAATAAACGGTTCGATCTGATGGGTGGTACAGCTGCTCGTTCAT
GGTCCCACTGTCCCATCTCATCAGAGAGAGAGAAGATCGTGAGAGAGCGAGAGATG













**miR166k**

GAATGGAGGCTGATCCAAGATCCTCCTCGAGTGCGAAACAAATGCCGTTTTTTTGGTTT  
TGTGTTTGCTCTCTTGGGGGGTCTCGGACCAGGCTTCATTCTC

(((((((.....))))))....

\*\*\*\*\*

\*\*\*TCGGACCAGGCTTCATTCTC\*\*

**miR166c-5p**

CGTTTTGTGGGGAACGTTGGCTGGCTCGAGGCATCCTTGCCGACGGCGCGGGTTCGAG  
GCGTCGGACCAGGCTTCATTCTTTCAAACCGCC

(((((((.....))))))....

\*\*\*\*\*GGAACGTTGGCTGGCTCGAGG\*\*\*\*\*

\*\*\*\*\*

**miR166a**

GCGGGTGTGGGAATGAGGTTGATCCAAGATCCTTCCTTTTTCTCCATTAATTCCTTCA  
GTACTGGTCATGATTAGTTACTTCATAATCGGTTGATCTCGGACCAGGCTTCATTCTG  
ACACCAAGCT

(((.....))))....

\*\*\*\*\*

\*\*\*\*\*TCGGACCAGGCTTCATTCC\*\*\*\*\*

**miR167b-3p**

ATCTGCACAACCTTGTGCTCAGGTATTTGAAGACAAGTCCACAAGGGAACAAGTGAA  
GCTGCCAGCATGATCTATCTTTGGTTAAGAGATGAATGTGTAAACATATTGCTTAAACCC  
AAGCTAGGTCATGCTCTGACAGCCTCACTCCTTCCTGGTTTAGGACCATTCACTGATAA  
AGCATTCCACATGCCGAT

(((.....))))....

\*\*\*\*\*

\*\*\*\*\*GGTCATGCTCTGACAGCCTCACT\*\*

\*\*\*\*\*

**miR167a**

GGTGTACAGGCATCTGATGAAGCTGCCAGCATGATCTAATTAACCTTCTTTCTCTGTTGA  
TTTTATGACAATGGAAAAGAGATGAGTGTGCGATTAGATCATGTTTCGCAGTTTCACCCAT  
TGACTGTCGCACC

(((((((.....))))))....

\*\*\*\*\*TGAAGCTGCCAGCATGATCTAA\*\*\*\*\*

\*\*\*\*\*

**miR167d**

TTTTGGGAGGCTGAAGCTGCCAGCATGATCTGTGTATAGATAGTGGTACCAGATCATCC  
TGCGGCTTCATTCACTCAAATCACCACAAT

(((((((.....))))))....

\*\*\*\*\*TGAAGCTGCCAGCATGATCT\*\*\*\*\*

\*\*\*\*\*

**miR167**

TCAAGCTGCCAGCATGATCTAAAAATCTCTGCATGTGGGGATTATCAGATCATGCTGCA  
GTTTAACCT

..(((((((.....)))))).....

**TCAAGCTGCCAGCATGATCTA**\*\*\*\*\*

**miR167f-3p**

CTCTATCAGTTGAAGCTGCCAGCATGATCTTAGCCTTCCTCCTTTGTTGAGGAAAGAAA  
CAGATCATGTGGCAGTTTCACCTGTTGT

.....(((((((.....)))))).....

\*\*\*\*\***AGATCATGTGGCAG**

**TTTACC**\*\*\*\*\*

**miR167h-5p**

CGCTATTAGTTGAAGCTGCCAACATGATCTGAGCTTTCCTTAATTTTCCTATACAGGAAA  
GACTAGATCATGTGGCAGTTTCACCTATTGA

.....(((((((.....)))))).....

\*\*\*\*\***TGAAGCTGCCAACATGATCTG**\*\*\*\*\*

\*\*\*\*\*

**miR167b**

CTGCCAAGGGAACGAGTGAAGCTGACAGCATGATCTATCTCCGAGTGATCAAACAAG  
AAACGCTGCGGCAGCCTCACTTCTCCCGGCG

..(((.....)))).....

\*\*\*\*\***TGAAGCTGACAGCATGATCTA**\*\*\*\*\*

\*\*\*\*\*

**miR167j-3p**

ATGAAGCTGCCAGCATGATCTGAAACCATACGTGTTCTTTGATTCCCATCTGAAGAAAG  
AGTTGGCTTTCATGGAGAACCGACGGTCAGATCATGTGGCAGTTTCATT

(((((((.....)))))).....

\*\*\*\*\*

\*\*\*\*\***GATCATGTGGCAGTTTCATT**\*

**miR167c**

TGCTCCATCATCAGATGAAGCTGCCAGCATGATCTTAATTCCTCTGTTTTATCGAGGA  
AAAATCAGATCATGTGGCAGTTTCACCTGTTGCTGCTGCAC

(((.....)))).....

\*\*\*\*\***TCAGATGAAGCTGCCAGCATGA**\*\*\*\*\*

\*\*\*\*\*

**miR168b**

ACCGTCTTGCTCGGATTCGCTTGGTGCAGGTCGAGAACTAATTGTCTAACACATCCACG  
AAGTTTTACTTGCTGGTTTGTGAGCAGGGATTGGATCCCGCCTTGCATCAATTGAATCG  
GAGCCCTGATCG

..(((.....)))).....

..

\*\*\*\*\***TCGCTTGGTGCAGGTCGAGAA**\*\*\*\*\*

\*\*\*\*\*

**miR168a**

TGTCTCTAATTCGCTTGGTGCAGGTCGGGACTAATTCGCCGGTGGCGGCGGCGCAAT











**miR172d-5p**

GTGCAGCACCATCAAGATTCACATCCCCAGCTCGATCTGTGCATGATGAGATGAGAATC  
TTGATGATGCTGCAT

(((((((((.....))))))))))

\*\*\*CAGCACCATCAAGATTCACA\*\*\*\*\*

\*\*

**miR172a-5p**

AGGCGGCACGCACAGTCGGCGCTTGCAGGTGCAGCACCAAGATTCACATCGGGT  
TCTCCAGTCGTAATTAATTAACGAGGAGTACAACCATGATGAGAATCTTGATGATGCTG  
CATCGGCAACCGCTCGACTACTCATCATATCGTCAAT

.((((.....(((((((.....))))))))))

\*\*\*\*\*GCAGCACCAAGATTCACA\*\*\*\*\*

\*\*\*\*\*

\*\*\*

**miR172b-5p**

TAGCTCATCTGTCGTTGTTTGTAGGTGCAGCACCATCAAGATTCACATGAAAATTGATA  
AATCTCCTAAATTAGGGTTTTGATATGTATATGAGAATCTTGATGATGCTGCATCAACAAT  
CGACGGCTACAAAATACCTAAAGCTG

((((((.....(((((((.....))))))))))

\*\*\*\*\*GCAGCACCATCAAGATTCACA\*\*\*\*\*

\*\*\*\*\*

**miR172a-3p**

GTTTGCGGGCGCGGCACCATCAAGATTCACATCCATCCATCCAGGCATCCTTCGGTTC  
GTTTCCAAAACGAAACGATCGACAACGCGTTGGATAACAATATAGATGTGCATGAGAATC  
TTGATGATGCTGCGTCCGCACACAA

((((((.....(((((((.....))))))))))

\*\*\*\*\*

\*\*\*\*\*AGAATCTTGATGATGCTGCGT\*\*\*\*\*

**miR172a-3p**

TAAGTACTTTCGCTTGCAGAGAGAAATCACAGTGGTCAAAAAGTTGTAGTTTTCTTA  
AAGTCTCTTTCCTCTGTGATTCTCTGTGTAAGCGAAAGAGCTTG

((((((.....(((((((.....))))))))))

\*\*\*\*\*TGA

TTCTCTGTGTAAGCGAAA\*\*\*\*\*

**miR319a-5p**

ATTATTAGAAATAGATGAAGAGAGCTTCCTTCAGTCCACTCATGGAAGGGTAAGGGGT  
TGAATTACCTGCTGACTCATTGATTCAAACACAATAGACAATTATGGGGTTATGCTATTG  
TGAATGTGTGAATGATGCAGGAGGTGAATTTCTTCTTTTCTTTGCTTGACTGAA  
GGGAGCTCCCTTTTCTATTATAAATTA

....((((.....(((((((.....))))))))))





GTAGAGAAGAATCTGTAAAGCTCAGGAGGGATAGCGCCATCATGATCACACACATCGA  
TATTTTTGGCGCTGTCCATCCTGAGTTTCATTGGCTCTTCTTACTAC  
(((((((((((((.....((.....))))))))))))))))))))))))))))))))))))))))))  
\*\*\*\*\*CGCTGTCCA  
TCCTGAGTTTCA\*\*\*\*\*

**miR390a-3p**

AGAATCTGTAAAGCTCAGGAGGGATAGCGCCATGGATGATCTTCTCTTCACTCTTGATC  
TTCTCTTGGCGCTATCCATCCTGAGTTTCATGGCTTCTATCTTCA  
(((((((((((((.....((.....))))))))))))))))))))))))))))))))))))))))))  
\*\*\*\*\*CGCTATCCA  
TCCTGAGTTTC\*\*\*\*\*

**miR390b-5p**

AGAATCTGTAAAGCTCAGGAGGGATAGCACCGTGATACTGATGATTATATGTTTCATAGTT  
GTATACGTACTTGGCGCTATCTATCTTGAGCTTCATGGCTTCT  
(((((((((((((.....((.....))))))))))))))))))))))))))))))))))))))))))  
\*\*\*\*\*AGCTCAGGAGGGATAGCACC\*\*\*\*\*  
\*\*\*\*\*

**miR390d-3p**

AGAATCTGTAAAGCTCAGGAGGGATAGCGCCCTAAGGATAACCATGGGCTCTTTTTATT  
TGGTTTTTGGACTATCAGTGGCGCTATCCATCCTGAGTTTTACTGGTT  
..(((((((((((((.....((.....))))))))))))))))))))))))))))))))))))))))))  
\*\*\*\*\*  
CGCTATCCATCCTGAGTTTCA\*\*\*\*\*

**miR393a-3p**

AGAGGAAGGATCCAAAGGGATCGCATTGATCCTAATTAAGGTGAATTCTCCCATATTT  
TCTTTATAATTGGCAAATAAATCACAAAATTTGCTTGGTTTTGGATCATGCTATCTCTTT  
GGATTCATCCTTC  
..(((((((((((((.....((.....))))))))))))))))))))))))))))))))))))))))))  
\*\*\*\*\*  
\*\*\*\*\*ATCATGCTATCTCTTTGGATT\*\*\*\*\*

**miR393b-3p**

AGAGAAAGGATCCAAAGGGATCGCATTGATCCTAATTAAGCTGATTATTCCCAATAA  
TTGTTTTTTTTTCTTCTCAATCGAAAGATGGAAGAAAACAAATTCCAAACATTTTG  
CTTACTTTTCCGGATCATGCGATCTCTTTGGATTCACTTTT  
(((((((((((((.....((.....))))))))))))))))))))))))))))))))))))))))))  
\*\*\*\*\*  
\*\*\*\*\*ATCATGCGATCTCTTTGGATT\*\*\*\*\*

**miR394-3p**

CGAGAGCTCTTTGGCATTCTGTCCACCTCCTTGTGAATCTTGCAGGGGAGATCTCACGA  
TCTGTTCGAGCTTGGCGGTTGCTTGGAGGTGGGCATACTGCCAATGGAGCTGTGTAG  
..(((((((((((((.....((.....))))))))))))))))))))))))))))))))))))))))))  
\*\*\*\*\*



CTTACCGTGGGTTCCCTTACAAGCACTTCACGAGGCATTATTACAAATGCCACTGTGAAG  
TGTTTGGGGGAACCTTTGGTGATGC

..(((((((.....))))))..)))))).....  
\*\*\*\*\*GTTCTTACAAGCACTTCACG\*\*\*\*\*  
\*\*\*\*\*

**miR395d**

GCTGTCTCTTGAGTTCCTCTGAGCACTTCACGTACGTGTGTGGCTAGTTCTATTCTGTA  
TTACCCTTAGATAGAATAGTCTTAATTAAGTGAAGTGTGGGGGAACCTTCGGGAACA  
AC

..(((.....))))..)))))).....  
\*\*\*\*\*TGAAGTGTGGGGGAACCTT\*\*\*\*\*

**miR395g**

GAGTTCCTCTGAACGCTTCATATAAGAGTTATCCATCTTCATTGAAGTGTGGGGGA  
ACTC

..(((.....))))..)))))).....  
\*\*\*\*\*TTGAAGTGTGGGGGAACCTC\*\*\*\*\*

**miR395a**

TTGTCCACTGGAGTTCCTCAATCCACTTCAGTAGATAGCTATGGCTAGGCCTCATTGC  
ATTGCACTGTACATAACTGTGATCATGGGGCCAAAAGCTAGCTATGTATAGTGAAGTG  
CTTGGGGGAACCTCCAGTTGACAC

..(((.....))))..)))))).....  
\*\*\*\*\*GTGAAGTGCTGGGGGAACCTC\*\*\*\*\*

**miR395f**

TTATCGCGGGTTCCTTCAATCACTTCACATGGTACTATTTCAAGGCCTACTATGTGAAT  
TGTTTGGGGGAACCTCTCGATGT

..(((.....))))..)))))).....  
\*\*\*\*\*GTGAATTGTGGGGGA  
CTC\*\*\*\*\*

**miR396d**

ATGGTGGTTTAAAGGAAACAAGGAGGAAGGTTTAGGGCTTTTTATTGGCAAATATGGAA  
GGTTTATCTCAACTGATGGCTTCATGCTTCTCCACGGCTTCTTGAACCTTAGTTTGAATA  
AGGTGAGCCTTCTTACAAGATCAAGAAAGCTGCGGAAAACATAGATCCACTCAAAT  
TATGAACCTTCAACAGAGAGATAGATCTCCAAGGTAAGTTATCTAGCCATTGT

..(((.....))))..)))))).....  
\*\*\*\*\*CTCCACGGCTTCTTGAACCT\*\*\*\*\*

**miR396c**

GCCATGTTTTCCACAGCTTCTTGAACCTTAAAAATTCAATGTGTTAATCCGTTCTCAA  
GAATTCCTTTTCGAGAATTCACGTGATTAAACGAAGTTCAAGAAAGCTGTGGGAAAAC













\*\*\*\*\*

**miR477i**

AAGGCATTTTGATTGTTCACTCTCCCTCAAGGGCTTCCGGCAGTGCCAGACATATGCGT  
GAATGGCGAGCTGGAGGTCCTCGGGGAGAGTGGACAATATACTGTCT

.((((.....((((((((((((((((.....((((((((((((.....((((.....))))))))).....))))))))).....))))))

\*\*\*\*\*ACTCTCCCTCAAGGGCTTCCG\*\*\*\*\*

\*\*\*\*\*

**miR477b**

CACTGCTTGTGTCTCTCCCTCAAGGGCTTCTCTTCTGCTTGTTTATAAGATTATAAGC  
TTTAATTAAGATGCTAAACTTAAAGCATACTGGGAATAGGAGCTCTTGCAGGTTGAGA  
CAACAAGAAATGCC

.....((((((((((((.....((((((((.....)))))).....)))))).....)))))).....)))))).....

...

\*\*\*\*\*TCTCTCCCTCAAGGGCTTCTC\*\*\*\*\*

\*\*\*\*\*

**miR477h**

AAGGCAATTCGCGTTTAACTCTCCCTCAAGGGCTTCAAGCTAGCCAACGTCCCTTTGCAT  
TCTCTTTCATGAGACTGGCGATGATGCACAGAGGAACGTGTTAAAGTTGAATCCCGGC  
GGGGGAGTTGGACGCGACCTGCCTT

(((.....((((((((((((.....((((((((.....)))))).....)))))).....)))))).....)))))).....

\*\*\*\*\*ACTCTCCCTCAAGGGCTTCAAG\*\*\*\*\*

\*\*\*\*\*

**miR477a-5p**

CCTCTCCCTCAAGGGCTTCTCTCCTGCATGCTTATATGTTGGAAAGAAGCTCTAGCAG  
GGAGAGCCA

.((((.....((((((((.....)))))).....)))))).....)))))).....

CCTCTCCCTCAAGGGCTTCTC\*\*\*\*\*

**miR529**

TGGTCGTGGCTGGCACCGTGGGTGGTGGTATCCCATGGCTGAGTACTTGACAGAAGAG  
AGAGAGCACAGCTTGAGTCGGCGGCGACCCCTGTGAGACACCCGCCTGGAGGGAGCT  
CTGGA

.((((.....((((((((.....)))))).....)))))).....)))))).....)))))).....)))))).....

\*\*\*\*\*AGAAGAGAGAGAGCACAGC\*\*\*\*\*

TT\*\*\*\*\*

**miR827**

TTTGAGCAGTGGATATGTTTGTGCTGGTACCTAGTTATTCATGGTTCCATCCATCT  
GCTGGCTTCAATATATAATTTGTGTTTGTATATGTTGATATATACATGCAGTATTGATATT  
TGACCCATGGCGGACGTTCTGATTAGATGACCATCAACGAACACATTCATGATGCAAG

.((((.....((((((((.....)))))).....)))))).....)))))).....)))))).....)))))).....

\*\*\*\*\*

\*\*\*\*\*TTAGATGAC\*\*\*\*\*

CATCAACGAACA\*\*\*\*\*











**miR5293**

GGTTGAAAATGATGAAGAAGTGAAGGAAGAAGAAGAAATGAAAACAAGGTTTTTAA  
TTTGAAATTTTGTTAATCCTTGTTTTGAATTTCTCCCTCTATAAGAGGCATCATGTCCAG  
CCA

(((((((((.....((((((((.....((((((((.....((((((((.....)))))))))...)))))))))...)))))))).  
\*\*\*\*\*GATGAAGAAGTGAAGGAAGAAGA\*\*\*\*\*  
\*\*\*\*\*

**miR5298a**

CGTTAGGTTTTCTTCATTTCTTCTAGATTTTCTTGGACTTTTGTGTTGAAGGTCCGAT  
GGATATGATATGAAGATGAAGAAGAAGAGAAG

.....((((((((((((((.....((((((((.....((((((((.....)))))))))...)))))))))...)))))))).  
\*\*\*\*\*TGGATATGATATGAA  
GATGAAGAA\*\*\*\*\*

**miR5654a**

TAATGATGTATTGTAGCTCTGCGTTTCTTGTTCGTTCACTCTTTTGTGAGGTATTAACAA  
GATAAATCCCAAGCATCATCCACCTTATTAGCCCTTGAACATGAAGGCTTGAAAATGG  
ATGATGCTTGGGATTTATTTGTACTCTCCTCTCTAAAGAGTGTGCTCCATAGGAC  
TACCAATGATTTGAGA

...(((.....((((((((.....((((((((.....((((((((.....)))))))))...)))))))))...)))))))).  
\*\*\*\*\*ATAAATCCCAAGC  
ATCATCCA\*\*\*\*\*  
\*\*\*\*\*

**Novel miRNAs**

**Lc-miRn1**

CAACAGTTGAGGGGAATGTTGTCTGGTGCGAGATCTTTCATCTCTTTTGAATGATTTCG  
GACCAGGCTTCATTCCTCAACATCCC

.....((((((((((((((.....((((((((.....((((((((.....)))))))))...)))))))))...)))))))).  
\*\*\*\*\*GGAATGTTGTCTGGTGCGAGA\*\*\*\*\*  
\*\*\*\*\*

\*\*\*\*\*TCGGACCAGGCTTCATT  
CCCC\*\*\*\*\*

**Lc-miRn2**

GTTTTATTGGGTTTCACTTGTCTTCTTGCACCAGCCAGAATCCTTTGGATTGAGAGA  
CCTCTGCTGAATGCTTGGTTGAAGAGGAGCCTGGTCTGGAATCCGACACAAAA

.....((((((((((((((.....((((((((.....((((((((.....)))))))))...)))))))))...)))))))).  
\*\*\*\*\*  
\*\*AGAGGAGCCTGGTCTGGAACTC\*\*\*\*\*

**Lc-miRn3**

TGAGGACAAGCAATGGCTTAAGTTTGGGGGTGTGATAACGCTCATTATGTGAGCTATT  
TAGCCTTAAAGACCTAGGTTATTGTTTAGAAAGCAAGAAGCTTTGTGCTTT

.....((((((((((((((.....((((((((.....((((((((.....)))))))))...)))))))))...)))))))).  
\*\*\*\*\*CAATGGCTTAAGTTGGGGT\*\*\*\*\*

\*\*\*\*\*

**Lc-miRn4**

AAGGGGTGTTTGGAAATGGAGTTTGTTCGAAAATCTTTGTTGTTTCTTATTCTTTTTCTTT  
GCAAAGTTTCTTTCTTTCTTTCTTTATGATCTTGAAGATTCTATGTCGTTTTTTCCGA  
CTAAAAGTTTGCCCTCTTCTTCGTCTTTGAAAAAATGATCTCGGACCAGGCTTCATTCC  
TCGCACGTCTA

.(((.....(((.....(((.....(((.....(((.....(((.....(((.....))).....))).....))).....))).....))).....))).....))).....))..

\*\*\*\*\*

\*\*\*\*\*

\*\*CTCGGACCAGGCTTCATTCCCT\*\*\*\*\*

**Lc-miRn5**

GGAGCTTTTTTCTTTGAGGGGAATGTTGTCTGGCTCGAGGACACTTGTTTTGATCCAT  
TTTTAATTCTCTGTTTCTTTCAATTTCCAATTTCAATTTGGTTCATTAGTCCGTCGGAC  
CAGGCTTCATTCCCCCAATTGCTTGCTCCATTT

((.....(((.....(((.....(((.....(((.....))).....))).....))).....))).....))).....))).....))..

\*\*\*\*\*GGAATGTTGTCTGGCTCGAGG\*\*\*\*\*

\*\*\*\*\*

\*\*\*

\*\*\*\*\*

\*\*\*\*\*TCGGACCAGGCTTCATTCCCC\*\*\*\*\*

\*\*\*

**Lc-miRn6**

TCCTCCGAGCCTCGTGATGACGCTTTTCTGAAGGTCTCGCTCCGTCCTCTCCTTAATC  
TATATGGTTTCAATGCGTGATTGATTATCGGCTCACTTTGGAATTGTGTGCGTTTGTGCT  
TTAACTGACAATGACAATTTCCATGTCGTGTTTATGTTCTTTAGAAGAGTGCGAATCG  
CAAAGTGTAGGAATAGGAAAGTAGTATACCGTTTGTTGTTTAAAGAACTATAGAATGAAT  
GAGTTGAGTTATGGATGGTCGGAGGTTTCTCATGAAGGTGTTGTCATGCGTTGGAAGAT

((.....(((.....(((.....(((.....))).....))).....))).....))).....))).....))).....))..

\*\*\*\*\*CCTCGTGATGACGCTTTTCTGA\*\*\*\*\*

\*\*\*\*\*

\*\*\*\*\*

\*\*\*\*\*

**Lc-miRn7**

CTGCCAATGAGCTCTGTTGGATTCTTTGTAAGAGCCCTCATGATTCTCCTCTCTTGT  
TTTTTTTTTTTTTTGAGAAATAATTTCAAAGCCTATGATCATGGAGGTTTCTGATCTTTC  
TCAGGAAAAAAGAAGCCAAAAAGTTTCAATCAAGGCTTACTAGGTTT

..(((.....(((.....(((.....))).....))).....))).....))).....))).....))..

\*\*\*\*\*AGCTCTGTTGGATTCTTTG\*\*\*\*\*

\*\*\*\*\*

\*\*\*\*\*

**Lc-miRn8**

ATTGTTGAGGAGAATGCGGTCTGGTTCGAGAGCATTTCATTGAATAAATTCAAAGAAA  
AATCTTTCGTCCGAATGATCTCGGACCAGGCTTCATTCTCGCCAGCTCT

...(((((((.....))))))))).....

\*\*\*\*\***AATGCGGTCTGGTTCGAGAGC**\*\*\*\*\*

\*\*\*\*\*

\*\*\*\*\***TC**

**TCGGACCAGGCTTCATTCT**\*\*\*\*\*

**Lc-miRn9**

TTCTTTTCTAGCCCTCGGGCTGCAGATTACCTCTTCCTTGCTGGCAATGCAAGATTTGC  
AACTCTTCTGCAAGTTTCTATGCTCTTTTCCTTCTGTTTTTATGTTATGTTCTCTCAAG  
ATTCATGTTATGAACATGGTATGGTGATGATTCTTCTGTACATGCTGCTGCAAGATT  
AAAACATCACATCCAAGTAGGTAAGATTTTACAGAACTGATAGCAGAAATGTC

..(((((((.....)))))).....

\*\*\*\*\***GCCCTCGGGCTGCAGATTACC**\*\*\*\*\*

\*\*\*\*\*

\*\*\*\*\*

\*\*\*\*

**Lc-miRn10**

TCAGAAGGTGCATGAAGAGCAAGATGGAGAAGCAGGGCACGTGCTGTACTAACTCCA  
CTCAAATGCAATTCAAAAATCACTTCTTTTTTTTTGTTGGGTTTTGAAAGAAGAGATAGA  
TTTTCAAATTTCAAACAAAAAAAATTCAGCTTTGTTGCCTTTGAGTTAGTTCTTCATGT  
GCCCTCTTCGCCATCGTGACCACTG

..(((((((.....)))))).....

\*\*\*\*\***TGGAGAAGCAGGGCACGTGCTG**\*\*\*\*\*

\*\*\*\*\*

\*\*\*\*\*

\*\*\*\*\*

\*\*\*\*\*

\*\*\*\*\***TCATGTGCCCTCTTCGCCATC**\*\*\*\*\*

**Lc-miRn11**

CCACCTATCTCAGATAGAGA ACTATGGGACCCATCGCAGCCTGCCTTATAAAAGGGTTT  
TGCAAGCGATTGCTCGACAGGACTTAGATCTGGTCTTTGAAGGAATGAAAAAAGGA  
GAGACTGGTAGAGCTCCTCTTTGTCAGCGGCATTCTCCCTTCTATCTATCAACCATTTC  
TTATGGA ACTTTCTCCCGAGCTGCGGA ACTAACAAGTCTATTAGAAAGTCGAATTAGC  
CACTTTTACACGAATTTCAAGTGGATGAAATCGGTTCGAGTGGTCTCAGTTGGGGATG  
GGATT

...(((((((.....)))))).....

\*\*\*\*\*









**Lc-miRn25a**

TGCCATGTTCTCCACAGCTTCTTGAACCTCCAAAGGGTTTTTTTTTTTTTAATTTTTGT  
TGCTAATCTCTAGGAGAGATTGCATAGAGAAAAAAAATGATCGAGCTGAGAAGAAGA  
TCAAATAAAAGAGAAGAAAGTTCAAGAAAGCTGTGGAAAAGCATGGCT

.(((((((...((((((((((((((((((...)))(((((((((((((((((...)))))))))...)))))))))))))

\*\*\*\*\***TCCACAGCTTCTTGAACTT**\*\*\*\*\*  
\*\*\*\*\*  
\*\*\*\*\*

**Lc-miRn25b**

AGCCATGCTTTCCACAGCTTCTTGAACCTTCTTCTCTTTTATTGATCTTCTTCTCAGC  
TCGATCATTTTTTTTTTCTCTATGCAATCTCTCCTAGAGATTAGCAACAAAAATTAATA  
AAAAAACCTTTGGAAAGTTCAAGAAAGCTGTGGGAGAACATGGCA

.(((((((...((((((((((((((((((...)))))))))...)))))))))))))

\*\*\*\*\***TCCACAGCTTCTTGAACTT**\*\*\*\*\*  
\*\*\*\*\*  
\*\*\*\*\*

\*\*\*\*\*  
\*\*\*\*\***GTTCAAGAAAGCTGT**

**GGGAGA**\*\*\*\*\*

**Lc-miRn26b**

ACCCATGAGTATCATCAAGAGACCTTGAACAATCTCAGGACTGGCATGCAAAATACTC  
AAATCCTTTGCGCCGTCATGCTCGATACCAAGGTCTGTTACTCTCCCCTGTTATAATGTT  
GGCTTGAAACTGATGAGTCATGCAATGATTCAAGTGTTTATCATTGTTCTGGCTTGGG  
TGATCTGAAAATGGAT

..(((((((...((((((((((((((((((...)))))))))...)))))))))))))

\*\*\*\*\*  
\*\*\*\*\*  
\*\*\*\*\***TGTTCTGGCTTGGGTGATCT**\*\*\*\*\*

**Lc-miRn27b**

ATCCTGCTATGTATTGGTGATGGGTATATAACGCAGCTTGAGTAGTAAAGTCTTGTGCTA  
TGAACGCATAAGCAGGTA

..(((((((...((((((((((((((((((...)))))))))...)))))))))))))

\*\*\*\*\*  
\*\*\*\*\***TAAAGTCTTGTGCTATGAACGCA**\*\*\*\*\*  
\*\*\*\*\*

**Lc-miRn28a**

TGGGGGTTTGTCAAAGGGTTTCCAACAGAATTTATTGGCATTCTGTCCACCTCCTTCTC  
TACAGAAAAACCCAAAAGGGTTCATGAAGAAACCAAAAAAAAAAATCCAAAAGG  
CCTTCACTTCTATTGTTTTTCTTTCATTTGGAGGTGGGCATACTGCCAACTGAGCTCT  
GTTTGGCTCCTCTTTGTAACACCCTC

.(((((((...((((((((((((((((((...)))))))))...)))))))))))))











.((((...(((((.....))))))...))))).  
\*\*\*\*\*  
\*\*\*\*\*ACATTCGTCTTCTAGATCCTT\*\*\*\*\*

**Lc-miRn52**

AATAATGTCTCTCTTGAATGATGACTATAAATATGTGTTTCTCTTTCATGTTATTCTGT  
GAAGAAAAGGTGTCAATGTCATGCATGAATTATTGTCATTGAAGAACAGTGGAGAGA  
GAATGATAGTCCATTGTTAAGAGATAATTGTATTGTA

.((((...(((((.....))))))...))))).  
\*\*\*\*\*CTCTCTTGAATGATGACTATA\*\*\*\*\*  
\*\*\*\*\*

**Lc-miRn53**

GTTCCGAAAAGTAACAATTTAGTCTCTAAACTTTAGTTTCAAACAATTTAATTTTGTA  
TTTAACTGTTGTAATAATTTAGTTTTTGAGCATACTATATATTAATTTAGTCTTTGTACTT  
TGTTGTTGTACACTTTGCCTAGAATGAGTAGTATGTTGAGAAATTTAACGCCTAGAC  
AATTCATGTGCTAATTTGCCTTGTAACCTCGTTTATTGAGTTGGTATTCGTAGGAAA

.((((...(((((.....))))))...))))).  
\*\*\*\*\*AGTAACAATTTAGTCTCTAAACT\*\*\*\*\*  
\*\*\*\*\*

**Lc-miRn54**

AGGTGCGTGCCGATCAGGATGGAGAAGCAGGGCACGTGCATTACTCACTCGTGGAAG  
TCCTAACACAACACCACCGGTGGCTGTGTCTGAGTGAGTGGGTTGTTTCATGTGCCCT  
CTTCTCCATCCTGACCACTG

.((((...(((((.....))))))...))))).  
\*\*\*\*\*TGGAGAAGCAGGGCACGTGCAT\*\*\*\*\*  
\*\*\*\*\*

**Lc-miRn55**

TTGCCGAGAAGAACAATAGCGAAGAGTCCATTCGCGCTAAATCAATTCGCGCCAAAAC  
TTGAGATTTTTTTTCTTTATTTTAGGGTTTGATTACCGATGGGCCCAAGGCCCAATCCA  
GTCCACGAAAACAAGCTTGAGTTTGCCCAATATCTATACTATTTGTAAGGAGTAT  
TTGTAGGGGATAGTTGCAAATTTACCATTAAATTTAAATTAATTAAGTATATAGCATAAT  
TTTAAAAAATTACAAATATAGCAAATTTGTCAAATTCATCTGGGCATGCTTCCTTTG  
CTTTGCTCTTCTTCTCA

.((((...(((((.....))))))...))))).  
\*\*\*\*\*TCATGTGCCCTCTTCTCCATC\*\*\*\*\*  
\*\*\*\*\*

**Lc-miRn55**

TTGCCGAGAAGAACAATAGCGAAGAGTCCATTCGCGCTAAATCAATTCGCGCCAAAAC  
TTGAGATTTTTTTTCTTTATTTTAGGGTTTGATTACCGATGGGCCCAAGGCCCAATCCA  
GTCCACGAAAACAAGCTTGAGTTTGCCCAATATCTATACTATTTGTAAGGAGTAT  
TTGTAGGGGATAGTTGCAAATTTACCATTAAATTTAAATTAATTAAGTATATAGCATAAT  
TTTAAAAAATTACAAATATAGCAAATTTGTCAAATTCATCTGGGCATGCTTCCTTTG  
CTTTGCTCTTCTTCTCA

.((((...(((((.....))))))...))))).  
\*\*\*\*\*









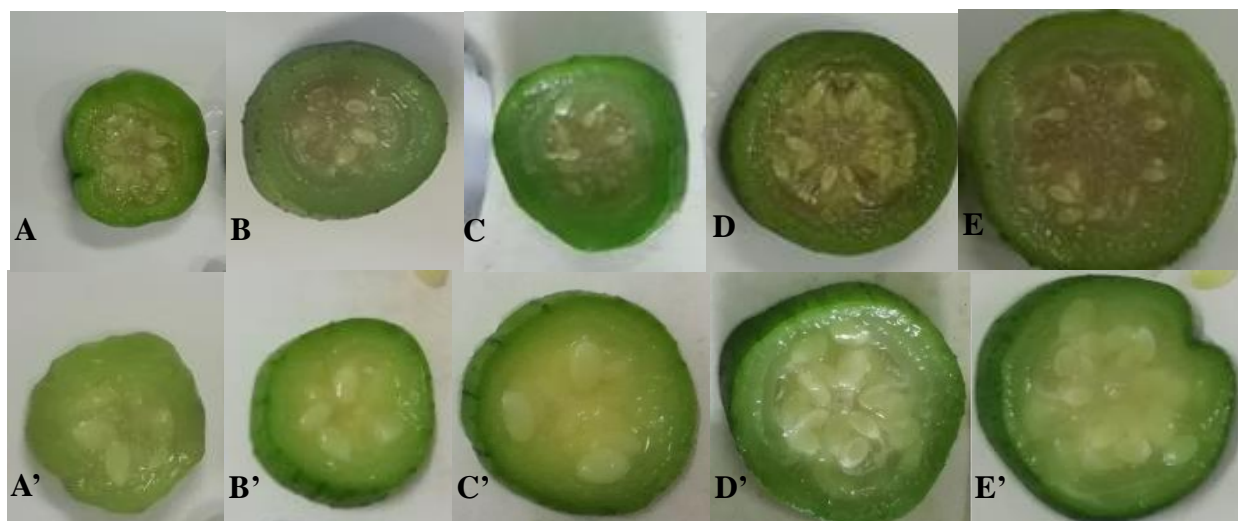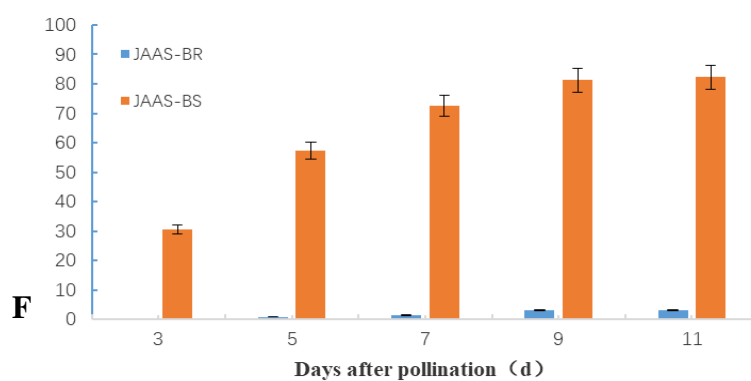

**Supplementary Figure S3: Appearance and browning index at different DAP of JAAS-BS and JAAS-BR.**

A-E successively represents 3, 5, 7, 9 and 11 DAP of JAAS-BS. A'-E' successively represents 3, 5, 7, 9 and 11 DAP of JAAS-BR. F represents browning index (BI) of JAAS-BS and JAAS-BR.
