# Supplementary material for: Identification of browning-related microRNAs and their targets reveals complex miRNA-mediated browning regulatory networks in Luffa cylindrica
Source: PubMed Central journal article supplement (PMC6214963; doi:10.1038/s41598-018-33896-9), 2018-11-02
Supplement: 41598_2018_33896_MOESM3_ESM.pdf [file 41598_2018_33896_MOESM3_ESM.pdf]

# Identification of browning-related microRNAs and their targets reveals complex miRNA-mediated browning regulatory networks in *Luffa cylindrica*

Yuanyuan Xu, Zhe Liu, Lina Lou, Xiaojun Su\*

**Supplementary Table S2: Distribution of small RNAs among different categories in JAAS-BR and JAAS-BS libraries.**

| Category    | JAAS-BR   |            | JAAS-BS   |            |
|-------------|-----------|------------|-----------|------------|
|             | Unique    | Total      | Unique    | Total      |
| Total sRNAs | 5,856,286 | 110,533,85 | 5,739,233 | 10,382,404 |
| miRNA       | 8,448     | 221,571    | 7,669     | 186,919    |
| rRNA        | 314,503   | 1,974,652  | 405,776   | 2,260,428  |
| snRNA       | 4,372     | 9,228      | 4,687     | 8,811      |
| snoRNA      | 11,970    | 46,485     | 11,089    | 43,460     |
| tRNA        | 30,642    | 474,383    | 29,676    | 358,969    |
| Unannotated | 5,486,351 | 8,181,631  | 5,280,336 | 7,394,420  |
